# Supplementary material for: Effects of exercise during chemotherapy for breast cancer on long-term cardiovascular toxicity
Source: PubMed Central journal article supplement (PMC10619040; doi:10.1136/openhrt-2023-002464), 2023-10-30
Supplement: openhrt-2023-002464supp001.pdf [file openhrt-2023-002464supp001.pdf]

1 **Supplemental file A: additional information on study outcomes.**

2

3 *Cardiac MRI*

4 Scans were performed on a 1.5T clinical MRI-scanner (Ingenia, Software release 4.1-5.3,  
5 Philips Healthcare). All exams (except two) were reviewed by the same cardiovascular  
6 imaging expert (TL) blinded to original treatment allocation. T1 maps were acquired in three  
7 short-axis views (basal, mid-ventricular, and apical) using a modified Look-Locker inversion  
8 (MOLLI) recovery sequence. Extracellular volume (ECV) fraction was calculated as  $(1 -$   
9  $\text{hematocrit} (\%) * \Delta R1_{\text{myocardium}} * \Delta R1_{\text{blood}})$ , where  $\Delta R1$  is defined as  $1/T1$ . T1 maps were  
10 anonymously analyzed using dedicated postprocessing software (Medis Suite version  
11 3.2.48.2, MapMaker ECV Application version 2.2.44) by a single researcher (WN). Intra-rater  
12 reliability coefficient in a subset of 15 scans was 0.94 (95%CI 0.86;0.98) for ECV and 0.88  
13 (95%CI 0.73;0.95) for native T1. For native T1 and ECV, the mean score of the three short-  
14 axis slices was used in the final analyses.

15

16 All patients underwent steady-state free precession sequences in multiple orientations for  
17 assessment of wall motion and measurement of functional parameters for both LV and right  
18 ventricle (RV). Except for ejection fraction (EF), all values were indexed to body surface  
19 area. All patients underwent viability and phase-sensitive inversion recovery enhancement  
20 imaging after administration of double-dose (0.2 mmol/kg) gadolinium-based contrast agent  
21 gadobutrol (Gadovist, Bayer Healthcare). Segmental late gadolinium enhancement patterns  
22 were classified as follows: subendocardial, mid-wall, transmural or epicardial.

23

24 The following imaging parameters were used:

- 25 - Field of view: 320x320 mm
- 26 - Matrix: 256x256
- 27 - Flip angle: 60°
- 28 - Parallel imaging acceleration factor: 3
- 29 - Slice thickness: 8.0mm
- 30 - Echo time: 1.7ms
- 31 - Repetition time; 4.0ms

32

33 T1 mapping parameters:

- 34 - Field of view: 300x300mm

- 35 - Matrix: 256x256
- 36 - Flip angle: 35°
- 37 - Parallel imaging acceleration factor: 2
- 38 - Slice thickness: 8.0mm
- 39 - Echo time: 1.1ms
- 40 - Repetition time; 4.0ms

41

#### 42 *Echocardiography*

43 Transthoracic 2D-echocardiograms were acquired using a GE Vivid E9 or E95 machine. In  
44 line with current guidelines for adult cancer survivors [1], measurements of LV function,  
45 dimensions, and diastology were performed using one cardiac cycle. Diastolic function was  
46 scored as *normal*, *indeterminate*, or *diastolic dysfunction*, according to the most recent  
47 guidelines [2]. Global longitudinal strain (GLS) was assessed via 2D-speckle tracking  
48 echocardiography in the apical four-, three – and two-chamber views using offline EchoPAC  
49 software (version 2.03, GE Vingmed, Horten, Norway). All echocardiography data were  
50 collected by the same researcher (WN), after receiving sufficient training in GLS analysis [3],  
51 and were reviewed by the same cardiologist (AT), blinded for original treatment allocation.

52

#### 53 *Cardiopulmonary exercise tests*

54 Cardiorespiratory fitness was assessed with a cardiopulmonary exercise test with continuous  
55 breathing gas analysis. Cycling workload increased every minute by 10,15 or 20 W till  
56 exhaustion, on the basis of participants' symptoms or at the discretion of the supervising  
57 physician. Peak oxygen uptake (VO<sub>2</sub>Peak) was defined as the average value for the last 30  
58 seconds before exhaustion and expressed in ml/kg/min. Only maximum exercise tests, defined  
59 as those where the respiratory exchange rate  $\geq 1.1$ , were included in the analysis.

60

#### 61 *Venous blood sample*

62 A fasting venous blood sample was taken to determine hematocrit (for ECV calculation),  
63 renal function, and presence of diabetes mellitus and hypercholesterolemia.

64

#### 65 *Physical activity*

66 The original PACT and PACES study used different questionnaires to assess physical activity before  
67 diagnosis; the Short Questionnaire to Assess Health enhancing physical activity (SQUASH) [4]  
68 and the Physical Activity Scale for Elderly (PASE) [5], respectively. In the FU study, the former

69 questionnaire was used. This questionnaire comprises questions on commuting activating,  
70 leisure-time and sports activities, household activities and work-related activities. We  
71 calculated the minutes per week of moderate-to high-intensity leisure and sport physical  
72 activity, which include all activities that correspond with a MET-value of  $\geq 3.0$ . To obtain an  
73 estimate for physical activity participants engaged in over the past years (i.e. since completion  
74 of the original PACT and PACES studies), we used a structured, face-to-face interview [6].  
75 All interviews were performed by the same researcher (WN). Total physical activity scores  
76 were derived in MET-hours per week [6].  
77

78 **Supplemental references**

79

- 80 1. J. C. Plana *et al.*, “Expert consensus for multimodality imaging evaluation of adult  
81 patients during and after cancer therapy: a report from the American Society of  
82 Echocardiography and the European Association of Cardiovascular Imaging.,” *Eur*  
83 *Heart J Cardiovasc Imaging*, vol. 15, no. 10, pp. 1063–1093, Oct. 2014, doi:  
84 10.1093/ehjci/jeu192.
- 85 2. S. F. Nagueh *et al.*, “Recommendations for the Evaluation of Left Ventricular  
86 Diastolic Function by Echocardiography: An Update from the American Society of  
87 Echocardiography and the European Association of Cardiovascular Imaging.,” *J Am*  
88 *Soc Echocardiogr*, vol. 29, no. 4, pp. 277–314, Apr. 2016, doi:  
89 10.1016/j.echo.2016.01.011.
- 90 3. J. Chan *et al.*, “Left Ventricular Global Strain Analysis by Two-Dimensional Speckle-  
91 Tracking Echocardiography: The Learning Curve.,” *J Am Soc Echocardiogr*, vol. 30,  
92 no. 11, pp. 1081–1090, Nov. 2017, doi: 10.1016/j.echo.2017.06.010.
- 93 4. G. C. W. Wendel-Vos, A. J. Schuit, W. H. M. Saris, and D. Kromhout,  
94 “Reproducibility and relative validity of the short questionnaire to assess health-  
95 enhancing physical activity.,” *J Clin Epidemiol*, vol. 56, no. 12, pp. 1163–1169, Dec.  
96 2003, doi: 10.1016/s0895-4356(03)00220-8.
- 97 5. R. A. Washburn, E. McAuley, J. Katula, S. L. Mihalko, and R. A. Boileau, “The  
98 physical activity scale for the elderly (PASE): evidence for validity.,” *J Clin*  
99 *Epidemiol*, vol. 52, no. 7, pp. 643–651, Jul. 1999, doi: 10.1016/s0895-4356(99)00049-  
100 9.
- 101 6. M. E. Schmidt, T. Slinger, J. Chang-Claude, J. Wahrendorf, and K. Steindorf,  
102 “Evaluation of a short retrospective questionnaire for physical activity in women.,”  
103 *Eur J Epidemiol*, vol. 21, no. 8, pp. 575–585, 2006, doi: 10.1007/s10654-006-9042-9.  
104  
105  
106

**Supplementary table 1a. Characteristics at baseline of original PACT participants, and those of participants and non-participants of the Pact-Paces-Heart study.** Presented as mean  $\pm$  SD, median (interquartile range] or number (percentages).

|                                           | <b>Total PACT<br/>N=204</b> | <b>Non-participants<br/>N=116</b> | <b>Participants<br/>N=88*</b> |
|-------------------------------------------|-----------------------------|-----------------------------------|-------------------------------|
| Age, years                                | 49.6 $\pm$ 8.0              | 49.2 $\pm$ 8.8                    | 50.1 $\pm$ 6.9                |
| Study group, %                            |                             |                                   |                               |
| Control                                   | 102 (50.0)                  | 60 (51.7)                         | 42 (47.7)                     |
| Intervention                              | 102 (50.0)                  | 56 (48.3)                         | 46 (52.3)                     |
| Treatment characteristics                 |                             |                                   |                               |
| AC dose, mg/m <sup>2</sup>                | 256.5 $\pm$ 79.9            | 260.6 $\pm$ 87.8                  | 251.1 $\pm$ 68.4              |
| Herceptin, %                              | 30 (14.8)                   | 16 (13.9)                         | 14 (15.9)                     |
| Radiotherapy, %                           | 141 (69.1)                  | 81 (69.8)                         | 60 (68.2)                     |
| Cardiovascular risk factors               |                             |                                   |                               |
| Hypertension, % <sup>†</sup>              | 25 (12.3)                   | 15 (12.9)                         | 10 (11.4)                     |
| Body mass index, kg/m <sup>2</sup>        | 26.2 $\pm$ 4.8              | 26.8 $\pm$ 5.1                    | 25.3 $\pm$ 4.4                |
| Obesity, % <sup>‡</sup>                   | 35 (17.2)                   | 23 (20.0)                         | 12 (13.6)                     |
| Any comorbidity, %                        | 26 (12.7)                   | 15 (12.9)                         | 11 (12.5)                     |
| Physical fitness                          |                             |                                   |                               |
| VO <sub>2</sub> peak <sub>baseline</sub>  | 23.8 $\pm$ 5.4              | 22.9 $\pm$ 5.1                    | 25.1 $\pm$ 5.5                |
| VO <sub>2</sub> peak <sub>end chemo</sub> | 21.1 $\pm$ 5.3              | 20.7 $\pm$ 5.4                    | 21.6 $\pm$ 5.1                |
| Attendance rate <sup>§</sup>              |                             |                                   |                               |
| N of classes, %                           | 83.3 (69.4-90.9]            | 78.8 (59.7-87.2]                  | 86.1 (77.8-91.2]              |
| >80%, %                                   | 54 (52.9)                   | 21 (37.5)                         | 33 (71.7)                     |

\* Of whom n=2 only participated via online questionnaires.

<sup>†</sup> Hypertension is defined as systolic blood pressure >140 mm Hg and diastolic blood pressure >90 mm Hg, or documented hypertension.

<sup>‡</sup> Obesity is defined as having a BMI>30 kg/m<sup>2</sup>. <sup>§</sup> Only applicable for participants in the exercise arm.

**Supplementary Table 1b. Characteristics at baseline of original PACES participants, and those of participants and non-participants of the Pact-Paces-Heart study.** Presented as mean  $\pm$  SD, median (interquartile range] or number (percentages).

|                                    | <b>Total PACES<br/>N=230</b> | <b>Non-participants<br/>N=133</b> | <b>Participants*<br/>N=97</b> |
|------------------------------------|------------------------------|-----------------------------------|-------------------------------|
| Age, years                         | 50.7 $\pm$ 9.1               | 50.6 $\pm$ 9.7                    | 50.7 $\pm$ 8.4                |
| Study group, %                     |                              |                                   |                               |
| Control                            | 77 (33.5)                    | 45 (34.1)                         | 32 (32.7)                     |
| Onco-Move                          | 77 (33.5)                    | 47 (35.6)                         | 30 (30.6)                     |
| On-Track                           | 76 (33.0)                    | 40 (30.3)                         | 36 (36.7)                     |
| Treatment characteristics          |                              |                                   |                               |
| AC dose, mg/m <sup>2</sup>         | 280.2 $\pm$ 65.5             | 283.5 $\pm$ 67.0                  | 276.1 $\pm$ 63.61             |
| trastuzumab %                      | 55 (23.9)                    | 29 (22.0)                         | 26 (26.5)                     |
| Radiotherapy, %                    | 180 (79.3)                   | 103 (79.8)                        | 77 (78.6)                     |
| Cardiovascular risk factors        |                              |                                   |                               |
| Hypertension, % <sup>†</sup>       | 36 (15.7)                    | 20 (15.2)                         | 16 (16.3)                     |
| Body mass index, kg/m <sup>2</sup> | 26.0 $\pm$ 4.5               | 26.4 $\pm$ 4.9                    | 25.5 $\pm$ 3.8                |
| Obesity, % <sup>‡</sup>            | 37 (16.2)                    | 26 (20.0)                         | 11 (11.2)                     |
| Smoking (baseline), %              | 29 (12.6)                    | 18 (13.6)                         | 11 (11.2)                     |
| Any comorbidity, %                 | 75 (32.6)                    | 15 (12.9)                         | 11 (12.5)                     |
| Cardiac comorbidity, %             | 7 (3.0)                      | 6 (4.5)                           | 1 (1.0)                       |
| Physical fitness                   |                              |                                   |                               |
| MSEC <sub>baseline</sub>           | 256.1 $\pm$ 48.5             | 251.1 $\pm$ 50.5                  | 262.9 $\pm$ 44.9              |
| MSEC <sub>end chemo</sub>          | 218.8 $\pm$ 61.5             | 208.3 $\pm$ 66.0                  | 232.4 $\pm$ 52.4              |
| Attendance rate <sup>§</sup>       |                              |                                   |                               |
| N of classes, %                    | 76.7 (60.7-85.2]             | 74.5 (56.9-83.6]                  | 79.1 (65.2-86.3]              |
| >80%, %                            | 30 (39.5)                    | 13 (32.5)                         | 17 (47.2)                     |

---

\* Of whom n=2 only participated via online questionnaires.

† Hypertension is defined as having a documented diagnosis of hypertension.

‡ Obesity is defined as having a BMI>30 kg/m<sup>2</sup>.

§ Only applicable for participants in the supervised exercise arm.

**Supplementary Table 2. Effect of randomization to an exercise program (low-intensity or a moderate-to high-intensity) during chemotherapy on cardiac outcomes based on an intention-to-treat analysis.**

| Imaging modality                        | Parameter            | Regression model | Unadjusted estimate (95%CI)  | Partially adjusted* estimate (95%CI) | Fully adjusted† estimate (95%CI) |
|-----------------------------------------|----------------------|------------------|------------------------------|--------------------------------------|----------------------------------|
| <b>Cardiac MRI</b>                      |                      |                  |                              |                                      |                                  |
|                                         | ECV                  | Linear           | -0.52 (-1.36, 0.32)          | -0.57 (-1.44, 0.30)                  | -0.47 (-1.33, 0.40)              |
|                                         | ECV (>28%)           | logistic         | 1.01 (0.41, 2.58)            | 0.95 (0.37, 2.51)                    | 0.98 (0.38, 2.64)                |
|                                         | Native T1            | Linear           | <b>-13.94 (-28.51, 0.63)</b> | <b>-19.03 (-33.32, -4.74)</b>        | <b>-19.05 (-33.61, -4.48)</b>    |
|                                         | Native T1 (>1020 ms) | Logistic         | 0.72 (0.39, 1.32)            | 0.60 (0.31, 1.15)                    | 0.57 (0.29, 1.10)                |
|                                         | LVEF                 | Linear           | -1.31 (-3.33, 0.70)          | -1.25 (-3.32, 0.82)                  | -1.01 (-3.06, 1.04)              |
|                                         | LVEF (<50%)          | logistic         | 1.69 (0.81, 3.71)            | 1.70 (0.78, 3.88)                    | 1.53 (0.69, 3.54)                |
| <b>Echocardiography</b>                 |                      |                  |                              |                                      |                                  |
|                                         | GLS                  | Linear           | 0.59 (-0.33, 1.52)           | 0.49 (-0.48, 1.46)                   | 0.44 (-0.53, 1.41)               |
|                                         | GLS (>-18%)          | Logistic         | 1.55 (0.80, 3.03)            | 1.48 (0.75, 2.98)                    | 1.50 (0.76, 3.02)                |
| <b>Cardiopulmonary exercise testing</b> |                      |                  |                              |                                      |                                  |
|                                         | VO <sub>2</sub> peak | Linear           | -0.92 (-2.97, 1.12)          | -0.34 (-2.27, 1.59)                  | -0.07 (-1.92, 1.79)              |

\* Partially adjusted includes adjustments for age, radiotherapy (none versus left-sided or right-sided), cumulative doxorubicin equivalent dosage, trastuzumab treatment and study (PACT vs PACES).

† Fully adjusted is the partially adjusted model with extra adjustment for the presence of cardiovascular risk factors (hypertension, hypercholesterolemia, diabetes mellitus, obesity and being a current smoker; none versus 1 or >1).



**Supplementary Table 3. Effect of participation in a moderate-to high-intensity exercise program during chemotherapy on cardiac outcomes based on an intention-to-treat analysis using unimputed versus imputed dataset.**

| Imaging modality | Parameter   | Regression model | Unimputed analyses <sup>*,†</sup><br>estimate (95%CI) | Imputed analyses <sup>*</sup><br>estimate (95%CI) |
|------------------|-------------|------------------|-------------------------------------------------------|---------------------------------------------------|
| <hr/>            |             |                  |                                                       |                                                   |
| Cardiac MRI      |             |                  |                                                       |                                                   |
|                  | ECV         | Linear           | -0.69 (-1.62, 0.25)                                   | -0.65 (-1.58, 0.28)                               |
|                  | ECV (>28%)  | logistic         | 0.76 (0.24, 2.34)                                     | 0.98 (0.87, 1.101)                                |
| Echocardiography |             |                  |                                                       |                                                   |
|                  | GLS         | Linear           | 0.31 (-0.76, 1.37)                                    | 0.53 (-0.49, 1.56)                                |
|                  | GLS (>-18%) | Logistic         | 1.34 (0.63, 2.88)                                     | 1.09 (0.92, 1.30)                                 |

\* Analyses are adjusted includes adjustments for age, radiotherapy (none versus left-sided or right-sided), cumulative doxorubicin equivalent dosage, trastuzumab treatment, study (PACT vs PACES) and the presence of cardiovascular risk factors (hypertension, hypercholesterolemia, diabetes mellitus, obesity and being a current smoker; none versus 1 or >1).

† GLS and ECV measurements could not be completed in 17.1% (31/181) and 11.6% (21/181) of all participants, respectively.

**Supplementary Table 4. Physical activity patterns per study group in the Pact-Paces-Heart study.**

Presented as median [interquartile range].

|                                                                                       | Control<br>N=72 | Mod.-to high-int. EX<br>N=80 | low-int. EX<br>N=29 |
|---------------------------------------------------------------------------------------|-----------------|------------------------------|---------------------|
| <hr/>                                                                                 |                 |                              |                     |
| Current physical activity (self-reported) <sup>a</sup>                                |                 |                              |                     |
| Moderate-to high-intensity leisure and sport physical activity, min/week <sup>b</sup> | 155 [60-360]    | 150 [60-368]                 | 240 [30-360]        |
| <hr/>                                                                                 |                 |                              |                     |
| Physical activity in the distant past (face-to-face interview) <sup>c</sup>           |                 |                              |                     |
| Total MET-hours/week                                                                  | 259 [227-295]   | 266 [236-298]                | 246 [227-282]       |
| Moderate-to high-intensity MET-hours/week                                             | 86 [56 -126]    | 94 [63-131]                  | 72 [44-120]         |
| <hr/>                                                                                 |                 |                              |                     |

<sup>a</sup> Data on leisure and sport physical activity data were missing in 7/181 (3.9%) participants.<sup>b</sup> Moderate-to high-intensity activities were defined as activities that corresponded with a metabolic equivalent task (MET) -value of 3 and higher.<sup>c</sup> Interviews were not conducted in 4/181 (2.2%) due to logistic constraints.

**Supplementary table 5. Association between self-reported moderate-to high-intensity leisure and sport physical activity at follow-up and cardiovascular outcomes.**

| Imaging modality                        | Parameter            | Regression model <sup>a</sup> | Unadjusted estimate (95%CI) | Fully adjusted <sup>b</sup> estimate (95%CI) |
|-----------------------------------------|----------------------|-------------------------------|-----------------------------|----------------------------------------------|
| <b>Cardiac MRI</b>                      |                      |                               |                             |                                              |
|                                         | ECV                  | Linear                        | 0.11 (-0.04, 0.25)          | 0.12 (-0.03, 0.27)                           |
|                                         | ECV (>28%)           | logistic                      | 1.06 (0.91, 1.23)           | 1.08 (0.92, 1.25)                            |
|                                         | Native T1            | Linear                        | -0.20 (-2.66, 2.26)         | -0.14 (-2.61, 2.34)                          |
|                                         | Native T1 (>1020 ms) | Logistic                      | 0.97 (0.87, 1.08)           | 0.96 (0.86, 1.06)                            |
|                                         | LVEF                 | Linear                        | -0.15 (-0.48, 0.18)         | -0.11 (-0.45, 0.23)                          |
|                                         | LVEF (<50%)          | logistic                      | 1.06 (0.94, 1.19)           | 1.06 (0.93, 1.20)                            |
| <b>Echocardiography</b>                 |                      |                               |                             |                                              |
|                                         | GLS                  | Linear                        | 0.14 (-0.01, 0.30)          | 0.15 (-0.02, 0.31)                           |
|                                         | GLS (>-18%)          | Logistic                      | 1.08 (0.97, 1.23)           | 1.08 (0.97, 1.22)                            |
| <b>Cardiopulmonary exercise testing</b> |                      |                               |                             |                                              |
|                                         | VO <sub>2</sub> peak | Linear                        | <b>0.53 (0.21, 0.85)</b>    | <b>0.70 (0.42, 0.98)</b>                     |

<sup>a</sup> All estimates are presented per 100 min/week of reported activity.

<sup>b</sup> Adjusted for age, radiotherapy (none versus left-sided or right-sided), cumulative doxorubicin equivalent dosage, trastuzumab treatment, study (PACT vs PACES) and the presence of cardiovascular risk factors (hypertension, hypercholesterolemia, diabetes mellitus, obesity and being a current smoker; none versus 1 or >1).
